# Supplementary material
Source: Research Square preprint supplement (doi:10.21203/rs.3.rs-10436403/v1)
Supplement: Supplementary file 1 [file 9aff6dd547a4d6556b093bd3.docx]

**Supplementary appendix to:**

**Establishing baselines for trophic rewilding: mammal density, occupancy, and activity patterns in two Italian sites**

*Niccolò Ceci1, Giacomo Masiello1, Davide Mirante1, Chiara Dragonetti1, Luca Santini1, Moreno Di Marco1*

1Department of Biology and Biotechnologies “Charles Darwin”, Sapienza University of Rome

# Table of contents

[**Table of contents 2**](#_rgdw0416ybm4)

[**Text S1: Detection zone in the REM formula 2**](#_bp7iqv57qno)

[**Text S2: Covariate extraction for occupancy 4**](#_kt2vbkfyjf9x)

[**Table S1: REM results (Alfina plateau, 2024) 5**](#_xq32bklnqofm)

[**Table S2: REM results (Diaccialone estate, 2025) 6**](#_8tms3e5wh91c)

[**Table S3: Naive occupancy values 7**](#_zbkheikdyfht)

[**Table S4: Occupancy covariate estimates (Alfina plateau, 2024) 8**](#_e56s5a7u9mbk)

[**Table S5: Occupancy covariate estimates (Diaccialone estate, 2025) 9**](#_w6z9e34uejuh)

[**Table S6: Mean daily activity 10**](#_t58mslhgsnpr)

[**Table S7: Overlap results (comparison across sites) 11**](#_xjixgxln28k3)

[**Table S8: Overlap results (Alfina plateau, 2024) 12**](#_uja6pt1pq8gv)

[**Table S9: Overlap results (Diaccialone estate, 2025) 13**](#_dveohxmjggbi)

[**References 15**](#_3lltpdxs302j)

# **Text S1**: Detection zone in the REM formula

The detection zone is a parameter that measures the area effectively monitored by camera traps. Considering that this area is a circular sector, we estimated the effective detection radius (EDR) and the effective detection angle (EDA), by following a standard distance sampling theory, in which a detection function describes the probability of detecting an animal as a function of its distance or angle from the camera, assuming that detection probability decreases as animals pass further from the sensor's core field of view [(Buckland et al. 2001; Rowcliffe et al. 2011)](https://www.zotero.org/google-docs/?27giJb). EDR and EDA are estimated by finding the threshold value at which the expected number of animals missed within that threshold equals the expected number detected beyond it [(Rowcliffe et al. 2011)](https://www.zotero.org/google-docs/?KoI4w1).

Distances and angles of each detection event from the camera trap were estimated photogrammetrically from images using an object of known size placed at systematic distances and angles from the sensor [(Hofmeester et al. 2017)](https://www.zotero.org/google-docs/?T4qmOH). All measurements were performed within the Agouti camera trap data management platform [(ENETWILD-Consortium et al. 2022)](https://www.zotero.org/google-docs/?myzWsv), by considering only the first contact of the encounters with the camera traps. Then, within a point-transect distance sampling framework, we evaluated two candidate models describing detection probability as a function of distance, namely the half-normal and the hazard-rate functions:

(*Half normal*) [1]

(*Hazard rate*) [2]

where a(y) is the detection probability at distance y, α defines the width of the function, and y in the hazard model defines its shape. We additionally tested cosine, Hermite polynomial, and simple polynomial series expansion terms as adjustment terms to increase model flexibility [(Rowcliffe et al. 2011)](https://www.zotero.org/google-docs/?I37zoP). All combinations of detection function and adjustment type were tested, and the best model was selected based on the Akaike Information Criterion (AIC).

To estimate the EDA, we used the angle of each detection event relative to the camera axis, applying a line-transect distance sampling approach following the same model selection procedure described above [(Rowcliffe et al. 2011; Hofmeester et al. 2017)](https://www.zotero.org/google-docs/?n1cVIs).

# **Text S2**: Covariate extraction for occupancy

Land cover data were extracted from the ESA WorldCover 2021 product [(Zanaga et al. 2022)](https://www.zotero.org/google-docs/?pzmEVb), a global land cover classification at 10 m spatial resolution. As the actual covariate, we extracted the percentage of each land cover class considered (i.e., Tree Cover, Grassland, Cropland, and Built-up) within each 1 km² sampling cell. The Normalized Difference Vegetation Index (NDVI) was derived from Landsat satellite imagery at 30 m spatial resolution, obtained through the United States Geological Survey (USGS) Earth Explorer portal [(Hemati et al. 2021)](https://www.zotero.org/google-docs/?pO6Z0D), and calculated using band math in ESA SNAP software. The mean NDVI value within each 1 km² cell was used as the actual covariate. Landscape fragmentation metrics were extracted in QGIS using the LecoS plugin [(Jung 2016)](https://www.zotero.org/google-docs/?9jBzUA) applied to the Tree Cover layer. For each metric, the mean value within each 1 km² sampling cell was retained. Regarding the human impact, we calculated in R as the minimum Euclidean distance from each camera trap to the nearest road, using the OpenStreetMap road network as the reference layer [(Curran et al. 2013)](https://www.zotero.org/google-docs/?3nyjzv). Livestock presence was included as a covariate only for the Diaccialone site, where semi-free-ranging cattle graze within fenced areas during the day. The spatial extent of these areas was digitised as polygons based on field knowledge of the area, and the minimum Euclidean distance from each camera trap to the nearest livestock polygon was used as the covariate.

# **Table S1**: REM results (Alfina plateau, 2024)

Random Encounter Model (REM) results in the Alfina plateau, obtained in 2024. For each target species, the results reported are: mean activity level (proportion of the day when the species is active), day range (distance travelled per day, expressed in km per day), effective detection radius (EDR, expressed in meters), effective detection angle (EDA, expressed in radians), trapping rate (captures over collective days of trapping), and density (expressed in individuals per km2).

| Species | Mean activity level (prop. /day) | Day range (km/day) | Mean EDR (m) | Mean EDA (radians) | Trapping rate (captures/days) | Density (ind/km2) |
| --- | --- | --- | --- | --- | --- | --- |
| Badger | 0.353 ± 0.031 | 9.512 ± 1.243 | 5.655 ± 0.292 | 0.401 ± 0.024 | 0.058 | 1.211 ± 0.637 |
| Marten* | 0.485 ± 0.064 | 17.031 ± 1.690 | 5.018 ± 0.138 | 0.295 ± 0.021 | 0.108 | 1.539 ± 0.468 |
| Porcupine | 0.269 ± 0.018 | 3.731 ± 0.271 | 5.354 ± 0.181 | 0.436 ± 0.031 | 0.163 | 8.926 ± 2.172 |
| Red fox | 0.598 ± 0.067 | 19.012 ± 2.580 | 5.562 ± 0.166 | 0.429 ± 0.038 | 0.128 | 1.331 ± 0.460 |
| Roe deer | 0.375 ± 0.034 | 4.534 ± 0.357 | 4.853 ± 0.356 | 0.436 ± 0.001 | 0.285 | 14.169 ± 2.911 |
| Wild boar | 0.432 ± 0.037 | 6.025 ± 0.629 | 5.794 ± 0.148 | 0.436 ± 0.002 | 0.305 | 9.564 ± 2.794 |

*Marten results refer to both pine marten (*Martes martes*) and beech marten (*Martes foina*), since it was not possible to distinguish the two species in most of the camera-trap pictures.

# **Table S2**: REM results (Diaccialone estate, 2025)

Random Encounter Model (REM) results in the Diaccialone estate, obtained in 2025. For each target species, the results reported are: mean activity level (proportion of the day when the species is active), effective detection radius (EDR, expressed in meters), effective detection angle (EDA, expressed in radians), trapping rate (captures over collective days of trapping), and density (expressed in individuals per km2).

| Species | Mean activity level (prop day) | Day range (km/day) | Mean EDR (m) | Mean EDA (radians) | Trapping rate (captures/day) | Density (ind/km2) |
| --- | --- | --- | --- | --- | --- | --- |
| Badger | 0.364 ± 0.039 | 9.107 ± 1.076 | 4.579 ± 0.311 | 0.314 ± 0.031 | 0.097 | 2.386 ± 0.578 |
| Marten* | 0.624 ± 0.065 | 13.558 ± 2.411 | 4.715 ± 0.359 | 0.471 ± 0.068 | 0.068 | 0.996 ± 0.561 |
| Porcupine | 0.332 ± 0.043 | 7.509 ± 1.658 | 6.391 ± 0.845 | 0.151 ± 0.059 | 0.056 | 1.428 ± 0.551 |
| Red fox | 0.375 ± 0.039 | 13.753 ± 1.387 | 5.629 ± 0.662 | 0.281 ± 0.073 | 0.148 | 2.251 ± 0.703 |
| Roe deer | 0.528 ± 0.046 | 5.273 ± 1.229 | 4.144 ± 0.385 | 0.448 ± 0.047 | 0.312 | 14.456 ± 5.021 |
| Wild boar | 0.244 ± 0.014 | 3.424 ± 0.491 | 6.293 ± 0.679 | 0.471 ± 0.001 | 0.811 | 39.796 ± 22.115 |

*Marten results refer to both pine marten (*Martes martes*) and beech marten (*Martes foina*), since it was not possible to distinguish the two species in most of the camera-trap pictures.

# **Table S3**: Naive occupancy values and mean detectability estimates

Naive occupancy values for the two study areas, calculated as the proportion of sampling sites where the species was detected, and mean detectability estimates for seven-day sampling occasions.

| **Species** | **Naïve Ψ** | | ***p̂*** | |
| --- | --- | --- | --- | --- |
| **Diaccialone** | **Alfina** | **Diaccialone** | **Alfina** |
| Badger | 0.92 | 0.58 | 0.08 | 0.24 |
| Marten* | 0.71 | 0.76 | 0.07 | 0.39 |
| Porcupine | 0.71 | 0.88 | 0.05 | 0.41 |
| Red fox | 0.92 | 0.88 | 0.10 | 0.29 |
| Roe deer | 0.92 | 0.88 | 0.14 | 0.71 |
| Wild boar | 1 | 0.88 | 0.12 | 0.54 |

*Marten results refer to both pine marten (*Martes martes*) and beech marten (*Martes foina*), since it was not possible to distinguish the two species in most of the camera-trap pictures.

# **Table S4**: Occupancy covariate estimates (Alfina plateau, 2024)

Averaged covariate estimates (β) and their corresponding standard errors (SE) or ĉ-adjusted adjusted standard errors (SEadj) for occupancy (ψ) and detection probability (p) parameters for each target species in the Alfina Plateau (2024). Estimates were obtained through model averaging, weighted by AICc weights (Burnham & Anderson 2002). Highlighted estimates denote covariates with Relative Variable Importance (RVI) > 0.8. All models were fitted using single-season, single-species occupancy models implemented in the R package “*unmarked*” (Fiske & Chandler 2011).

| **ALFINA** | | **Marten*** | | **Porcupine** | | **Wild boar** | | **Roe deer** | | **Badger** | | **Red fox** | |
| --- | --- | --- | --- | --- | --- | --- | --- | --- | --- | --- | --- | --- | --- |
| **β** | **SE** | **β** | **SEadj** | **β** | **SEadj** | **β** | **SEadj** | **β** | **SEadj** | **β** | **SEadj** |
| **Tree cover** | **ψ** | -0.22 | 0.62 | 0.38 | 1.65 | -0.45 | 0.96 | -0.49 | 3.78 | 0.96 | 2.22 | -0.96 | 1.45 |
| **p** | -0.20 | 0.19 | -0.05 | 0.23 | 0.37 | 0.22 | 0.46 | 0.96 | -0.20 | 0.27 | 0.07 | 0.18 |
| **Grassland** | **ψ** | -2.73 | 2.34 | -1.79 | 1.52 | 1.09 | 1.67 | 1.02 | 6.38 | -0.69 | 1.11 | -0.36 | 1.21 |
| **p** | 0.86 | 0.33 | 0.33 | 0.25 | -0.41 | 0.20 | -0.15 | 0.85 | 0.52 | 0.36 | -0.19 | 0.18 |
| **Built up** | **ψ** | 1.73 | 1.71 | 1.87 | 3.62 | -0.66 | 0.87 | -0.59 | 3.28 | 0.41 | 1.03 | 0.64 | 2.11 |
| **p** | -0.47 | 0.19 | 0.08 | 0.17 | 0.10 | 0.22 | **-0.61** | **0.87** | 0.19 | 0.32 | -0.33 | 0.18 |
| **Fractal dimension index** | **ψ** | 0.17 | 0.71 | 1.29 | 1.81 | 0.81 | 1.72 | 0.80 | 6.74 | 1.27 | 1.72 | 2.26 | 3.49 |
| **Distance from primary roads** | **ψ** | -0.21 | 0.65 | 0.22 | 0.99 | 2.12 | 4.46 | 2.20 | 18.6 | -0.90 | 1.86 | -0.75 | 1.35 |
| **p** | -0.33 | 0.22 | **-0.43** | **0.19** | **0.53** | **0.23** | -0.13 | 0.98 | -0.42 | 0.36 | -0.06 | 0.21 |

*Marten results refer to both pine marten (*Martes martes*) and beech marten (*Martes foina*), since it was not possible to distinguish the two species in most of the camera-trap pictures.

# **Table S5**: Occupancy covariate estimates (Diaccialone estate, 2025)

Averaged covariate estimates (β) and their corresponding standard errors (SE) or ĉ-adjusted adjusted standard errors (SEadj) for occupancy (ψ) and detection probability (p) parameters for each target species in the Alfina Plateau (2024). Estimates were obtained through model averaging, weighted by AICc weights (Burnham & Anderson 2002). Highlighted estimates denote covariates with Relative Variable Importance (RVI) > 0.8. All models were fitted using single-season, single-species occupancy models implemented in the R package “*unmarked*” [(Fiske & Chandler 2011)](https://www.zotero.org/google-docs/?EANXsb).

| **DIACCIALONE** | | **Marten*** | | **Porcupine** | | **Wild boar** | | **Roe deer** | | **Badger** | | **Red fox** | |
| --- | --- | --- | --- | --- | --- | --- | --- | --- | --- | --- | --- | --- | --- |
| **β** | **SE** | **β** | **SE** | **β** | **SE** | **β** | **SE** | **β** | **SE** | **β** | **SE** |
| **Tree cover** | **ψ** | 0.01 | 0.96 | NA | NA | NA | NA | NA | NA | NA | NA | NA | NA |
| **p** | 0.37 | 0.19 | 0.34 | 0.28 | -0.08 | 0.11 | -0.05 | 0.11 | 0.05 | 0.15 | -0.10 | 0.13 |
| **Shrubland** | **ψ** | -1.56 | 3.03 | 0.13 | 0.71 | NA | NA | 1.97 | 2.95 | 1.97 | 3.01 | 1.96 | 2.96 |
| **p** | -0.58 | 0.24 | 0.02 | 0.19 | -0.17 | 0.12 | 0.09 | 0.11 | -0.20 | 0.14 | -0.14 | 0.13 |
| **Cropland** | **ψ** | -0.13 | 1.30 | -0.63 | 0.72 | NA | NA | NA | NA | NA | NA | NA | NA |
| **p** | -0.07 | 0.25 | -0.41 | 0.34 | 0.10 | 0.11 | -0.01 | 0.11 | 0.02 | 0.14 | 0.10 | 0.12 |
| **Fractal dimension index** | **ψ** | 0.46 | 0.78 | 1.40 | 1.70 | NA | NA | 0.68 | 1.32 | 0.68 | 1.36 | 0.68 | 1.34 |
| **Distance from livestock** | **ψ** | 3.63 | 2.62 | -0.12 | 0.77 | NA | NA | NA | NA | NA | NA | NA | NA |
| **p** | 0.61 | 0.29 | 0.30 | 0.20 | -0.04 | 0.11 | 0.22 | 0.11 | 0.14 | 0.14 | -0.10 | 0.13 |

*Marten results refer to both pine marten (*Martes martes*) and beech marten (*Martes foina*), since it was not possible to distinguish the two species in most of the camera-trap pictures.

# **Table S6**: Mean daily activity

Mean daily activity (hours spent active per day) of the target mammal species in the Alfina plateau (2024) and in the Diaccialone estate (2025), estimated from camera-trap encounters by using the *activity* package [(Rowcliffe 2016)](https://www.zotero.org/google-docs/?zpIO0V).

| Species | Alfina mean activity  (hours spent active per day) | Diaccialone mean activity  (hours spent active per day) |
| --- | --- | --- |
| Badger | 8.47 ± 0.74 | 8.74 ± 0.94 |
| Marten* | 11.64 ± 1.54 | 14.98 ± 1.56 |
| Porcupine | 6.46 ± 0.43 | 7.97 ± 1.03 |
| Red fox | 14.35 ± 1.61 | 9.00 ± 0.94 |
| Roe deer | 9.00 ± 0.82 | 12.67 ± 1.10 |
| Wild boar | 10.37 ± 0.89 | 5.86 ± 0.34 |

*Marten density is referred to both pine marten (*Martes martes*) and beech marten (*Martes foina*), since it was not possible to distinguish the two species in most of the camera-trap pictures.

# **Table S7**: Overlap results (comparison across sites)

Pairwise overlap in diel activity patterns between the same target species recorded at the Alfina plateau (2024) and the Diaccialone estate (2025). For each species, the number of detections used to fit the activity models (n) is reported for each study area, along with the overlap coefficient (Δ), representing the proportion of the diel activity curve shared between the two areas, its 95% bootstrap confidence interval (95% CI), and the p-value of the Wald test for differences in overall activity levels. The Dhat4 estimator was used for all species, with 95% CI obtained via percentile bootstrap resampling (1000 iterations) [(Meredith & Ridout 2014)](https://www.zotero.org/google-docs/?awD8Hb).

| Species | Alfina (n) | Diaccialone (n) | Δ (overlap) | CI 95% | p-value |
| --- | --- | --- | --- | --- | --- |
| Badger | 83 | 126 | 0.753 | [0.681 – 0.863] | 0.9182 |
| Marten* | 155 | 87 | 0.830 | [0.728 – 0.899] | 0.1316 |
| Porcupine | 233 | 72 | 0.630 | [0.556 – 0.772] | 0.1646 |
| Red fox | 183 | 192 | 0.753 | [0.683 – 0.847] | 0.0034 |
| Roe deer | 405 | 413 | 0.787 | [0.758 – 0.872] | 0.0055 |
| Wild boar | 436 | 1055 | 0.630 | [0.626 – 0.723] | 0.0001 |

*Marten results refer to both pine marten (*Martes martes*) and beech marten *(Martes foina*), since it was not possible to distinguish the two species in most of the camera trap pictures.

# **Table S8**: Overlap results (Alfina plateau, 2024)

Pairwise overlap in diel activity patterns among the six target species recorded at the Alfina plateau (2024). For each species pair, the number of detections used to fit the activity models (n) is reported, along with the overlap coefficient (Δ), representing the proportion of the diel activity curve shared between the two species, its 95% bootstrap confidence interval (95% CI), and the p-value of the Wald test for differences in overall activity levels. The Dhat4 estimator was used for all pairwise comparisons, with 95% CI obtained via percentile bootstrap resampling (1000 iterations) (Meredith & Ridout 2014).

| Species 1 | Species 2 | n1 | n2 | Δ (overlap) | CI 95% | p-value |
| --- | --- | --- | --- | --- | --- | --- |
| Badger | Marten* | 83 | 155 | 0.604 | [0.538 - 0.729] | 0.066 |
| Badger | Porcupine | 83 | 233 | 0.818 | [0.719 - 0.886] | 0.022 |
| Badger | Red fox | 83 | 183 | 0.660 | [0.596 - 0.774] | < 0.001 |
| Badger | Roe deer | 83 | 405 | 0.508 | [0.480 - 0.636] | 0.635 |
| Badger | Wild boar | 83 | 436 | 0.689 | [0.640 - 0.803] | 0.098 |
| Marten* | Porcupine | 155 | 233 | 0.449 | [0.421 - 0.572] | 0.001 |
| Marten* | Red fox | 155 | 183 | 0.827 | [0.753 - 0.909] | 0.211 |
| Marten* | Roe deer | 155 | 405 | 0.848 | [0.771 - 0.902] | 0.132 |
| Marten* | Wild boar | 155 | 436 | 0.812 | [0.736 - 0.873] | 0.475 |
| Porcupine | Red fox | 233 | 183 | 0.533 | [0.489 - 0.633] | < 0.001 |
| Porcupine | Roe deer | 233 | 405 | 0.357 | [0.361 - 0.470] | 0.006 |
| Porcupine | Wild boar | 233 | 436 | 0.550 | [0.529 - 0.644] | < 0.001 |
| Red fox | Roe deer | 183 | 405 | 0.775 | [0.714 - 0.843] | 0.002 |
| Red fox | Wild boar | 183 | 436 | 0.811 | [0.766 - 0.889] | 0.024 |
| Roe deer | Wild boar | 405 | 436 | 0.758 | [0.720 - 0.824] | 0.249 |

*Marten results refer to both pine marten (*Martes martes*) and beech marten (*Martes foina*), since it was not possible to distinguish the two species in most of the camera-trap pictures.

# **Table S9**: Overlap results (Diaccialone estate, 2025)

Pairwise overlap in diel activity patterns among the six target species recorded at the Diaccialone estate (2025). For each species pair, the number of detections used to fit the activity models (n) is reported, along with the overlap coefficient (Δ), representing the proportion of the diel activity curve shared between the two species, its 95% bootstrap confidence interval (95% CI), and the p-value of the Wald test for differences in overall activity levels. The Dhat4 estimator was used for all pairwise comparisons, with 95% CI obtained via percentile bootstrap resampling (1000 iterations) (Meredith & Ridout 2014).

| Species 1 | Species 2 | n1 | n2 | Δ (overlap) | CI 95% | p-value |
| --- | --- | --- | --- | --- | --- | --- |
| Badger | Marten* | 126 | 87 | 0.639 | [0.554 - 0.753] | < 0.001 |
| Badger | Porcupine | 126 | 72 | 0.903 | [0.770 - 0.936] | 0.815 |
| Badger | Red fox | 126 | 192 | 0.789 | [0.738 - 0.883] | 0.628 |
| Badger | Roe deer | 126 | 413 | 0.496 | [0.480 - 0.619] | 0.003 |
| Badger | Wild boar | 126 | 1055 | 0.565 | [0.551 - 0.663] | 0.014 |
| Marten* | Porcupine | 87 | 72 | 0.616 | [0.527 - 0.749] | < 0.001 |
| Marten* | Red fox | 87 | 192 | 0.733 | [0.635 - 0.832] | 0.001 |
| Marten* | Roe deer | 87 | 413 | 0.811 | [0.718 - 0.890] | 0.291 |
| Marten* | Wild boar | 87 | 1055 | 0.673 | [0.626 - 0.772] | < 0.001 |
| Porcupine | Red fox | 72 | 192 | 0.810 | [0.734 - 0.894] | 0.494 |
| Porcupine | Roe deer | 72 | 413 | 0.456 | [0.449 - 0.607] | 0.002 |
| Porcupine | Wild boar | 72 | 1055 | 0.529 | [0.491 - 0.646] | 0.061 |
| Red fox | Roe deer | 192 | 413 | 0.630 | [0.589 - 0.734] | 0.009 |
| Red fox | Wild boar | 192 | 1055 | 0.652 | [0.612 - 0.725] | 0.002 |
| Roe deer | Wild boar | 413 | 1055 | 0.730 | [0.712 - 0.792] | < 0.001 |

*Marten results refer to both pine marten (*Martes martes*) and beech marten (*Martes foina*), since it was not possible to distinguish the two species in most of the camera-trap pictures.

#

# References

[Buckland ST, Anderson DR, Burnham KP, Laake JL, Borchers DL, Thomas L. 2001. Introduction to Distance Sampling: Estimating Abundance of Biological Populations. Oxford University PressOxford. Available from https://academic.oup.com/book/53746 (accessed May 22, 2026).](https://www.zotero.org/google-docs/?ffgWgI)

[Curran K, Crumlish J, Fisher G. 2013. OpenStreetMap. Pages 540–549 Geographic Information Systems: Concepts, Methodologies, Tools, and Applications. IGI Global. Available from https://www.igi-global.com/chapter/content/www.igi-global.com/chapter/content/70461 (accessed June 30, 2024).](https://www.zotero.org/google-docs/?ffgWgI)

[ENETWILD-Consortium, Liefting Y, Casaer J, Desmet P, Rowcliffe J m., Jansen P a. 2022. Update on the development of the Agouti platform for collaborative science with camera traps and a tool for wildlife abundance estimation. EFSA Supporting Publications **19**:7327E.](https://www.zotero.org/google-docs/?ffgWgI)

[Fiske I, Chandler R. 2011. unmarked: An R Package for Fitting Hierarchical Models of Wildlife Occurrence and Abundance. Journal of Statistical Software **43**:1–23.](https://www.zotero.org/google-docs/?ffgWgI)

[Hemati M, Hasanlou M, Mahdianpari M, Mohammadimanesh F. 2021. A Systematic Review of Landsat Data for Change Detection Applications: 50 Years of Monitoring the Earth. Remote Sensing **13**:2869. Multidisciplinary Digital Publishing Institute.](https://www.zotero.org/google-docs/?ffgWgI)

[Hofmeester TR, Rowcliffe JM, Jansen PA. 2017. A simple method for estimating the effective detection distance of camera traps. Remote Sensing in Ecology and Conservation **3**:81–89. Wiley-Blackwell.](https://www.zotero.org/google-docs/?ffgWgI)

[Jung M. 2016. LecoS - A python plugin for automated landscape ecology analysis. Ecological Informatics **31**:18–21. Elsevier.](https://www.zotero.org/google-docs/?ffgWgI)

[Marcus Rowcliffe. 2016. activity: Animal Activity Statistics. Available from https://CRAN.R-project.org/package=activity (accessed May 18, 2026).](https://www.zotero.org/google-docs/?ffgWgI)

[Meredith M, Ridout MS. 2014, June 6. The Overlap Package. Central R Archive Network. Available from https://kar.kent.ac.uk/41474/ (accessed June 2, 2025).](https://www.zotero.org/google-docs/?ffgWgI)

[Rowcliffe JM, Carbone C, Jansen PA, Kays R, Kranstauber B. 2011. Quantifying the sensitivity of camera traps: An adapted distance sampling approach. Methods in Ecology and Evolution **2**:464–476.](https://www.zotero.org/google-docs/?ffgWgI)

[Zanaga D et al. 2022, October 28. ESA WorldCover 10 m 2021 v200. Zenodo. Available from https://zenodo.org/records/7254221 (accessed June 3, 2025).](https://www.zotero.org/google-docs/?ffgWgI)
